# Supplementary material
Source: publisher site journal article supplement (https://www.spandidos-publications.com/5108/downloadSupplementary)
Supplement: Supplementary file 1 [file downloadSupplementary]

## Sheet: Table S11
Table SXI. The P-value of DNase expression and the stromal score in different cancer types.
Cancer type	DNASE1	DNASE1L1	DNASE1L2	DNASE1L3	DNASE2	DNASE2B
ACC	0.0128299	0.350592	6.7658e-10	0.000243684	0.663071	0.603265
BLCA	3.43816e-11	0.275155	2.06619e-09	6.07236e-21	0.00133137	0.0512726
BRCA	0.017185	0.683153	2.62979e-10	1.34313e-45	3.26328e-07	1.06565e-17
CESC	0.265035	0.682459	0.0360705	0.00229998	0.0795882	2.5081e-06
CHOL	0.652259	0.52002	0.781025	0.0381538	0.700586	0.020153
COAD	0.0423279	0.968369	6.44036e-05	0.217706	1.42485e-06	0.181466
DLBC	0.548729	0.158529	0.00832262	0.70892	0.002869	0.0354425
ESCA	0.246108	0.149559	0.310843	0.578204	0.0106911	0.145881
GBM	9.4973e-09	0	1.61644e-05	0.00697727	0	0.882602
HNSC	3.79276e-08	0.000149921	0.00800001	0.13826	0.114342	1.90715e-22
KICH	0.956474	0.0397065	0.00121454	0.00351001	0.56792	0.0213192
KIRC	2.64112e-08	0.883267	4.88111e-11	6.76934e-07	0.140595	3.85493e-09
KIRP	1.79694e-14	0.0118263	4.31782e-11	6.72643e-11	0	1.02837e-16
LAML	0.0688009	0.000907244	0.0817376	2.25198e-08	0.0307074	0.47895
LGG	0	0	0	0.0175377	0	1.36177e-18
LIHC	0.174484	0.00126418	4.32619e-06	5.822e-12	0.529446	1.52314e-09
LUAD	3.46741e-05	0.164276	0.00221621	1.60989e-09	3.55626e-12	1.18605e-20
LUSC	2.10897e-07	2.03445e-05	0.000102971	0.827223	0.169821	4.61719e-20
MESO	0.00958407	0.358042	0.508015	2.41442e-05	0.301028	0.0428377
OV	0.0140801	1.25419e-05	0.173678	2.01462e-11	0.118163	8.46458e-07
PAAD	1.85372e-06	0.0121798	0	1.91463e-06	0.01397	4.75361e-05
PCPG	1.84327e-10	0.0230635	0.00153203	2.67464e-08	0.166345	0.00858081
PRAD	1.64031e-07	0.00189641	0.00383058	0	1.84454e-05	2.88413e-06
READ	0.0478836	5.6354e-05	0.396452	0.880906	0.0010296	0.992272
SARC	0	0.255721	2.0747e-06	9.74828e-10	0.00803223	0.0164686
SKCM	0.0181469	0.742691	0.00853257	2.31976e-25	7.89824e-06	0.137243
STAD	0.0019233	0.645632	7.6858e-10	0.00160273	2.13049e-05	3.18825e-07
TGCT	0.000389293	0	0.439702	0.360786	2.03325e-10	0.0671986
THCA	0.00889464	0.00267912	0.000744938	0.199868	3.41815e-13	1.71832e-11
THYM	0.826649	0.483878	0.517285	0.36877	0.00181914	0.180106
UCEC	0.164352	0.789929	0.235514	1.50917e-32	0.0230484	1.50932e-05
UCS	0.134317	0.346066	0.38991	0.00198067	0.734608	0.0341406
UVM	0.0441434	0.760636	0.570947	0	0.000479269	3.35661e-05
